# Supplementary material for: High temperature perception in leaves promotes vascular regeneration and graft formation in distant tissues
Source: PubMed Central journal article supplement (PMC8959136; doi:10.1242/dev.200079), 2022-02-28
Supplement: develop-149-200079-s1.pdf [file develop-149-200079-s1.pdf]

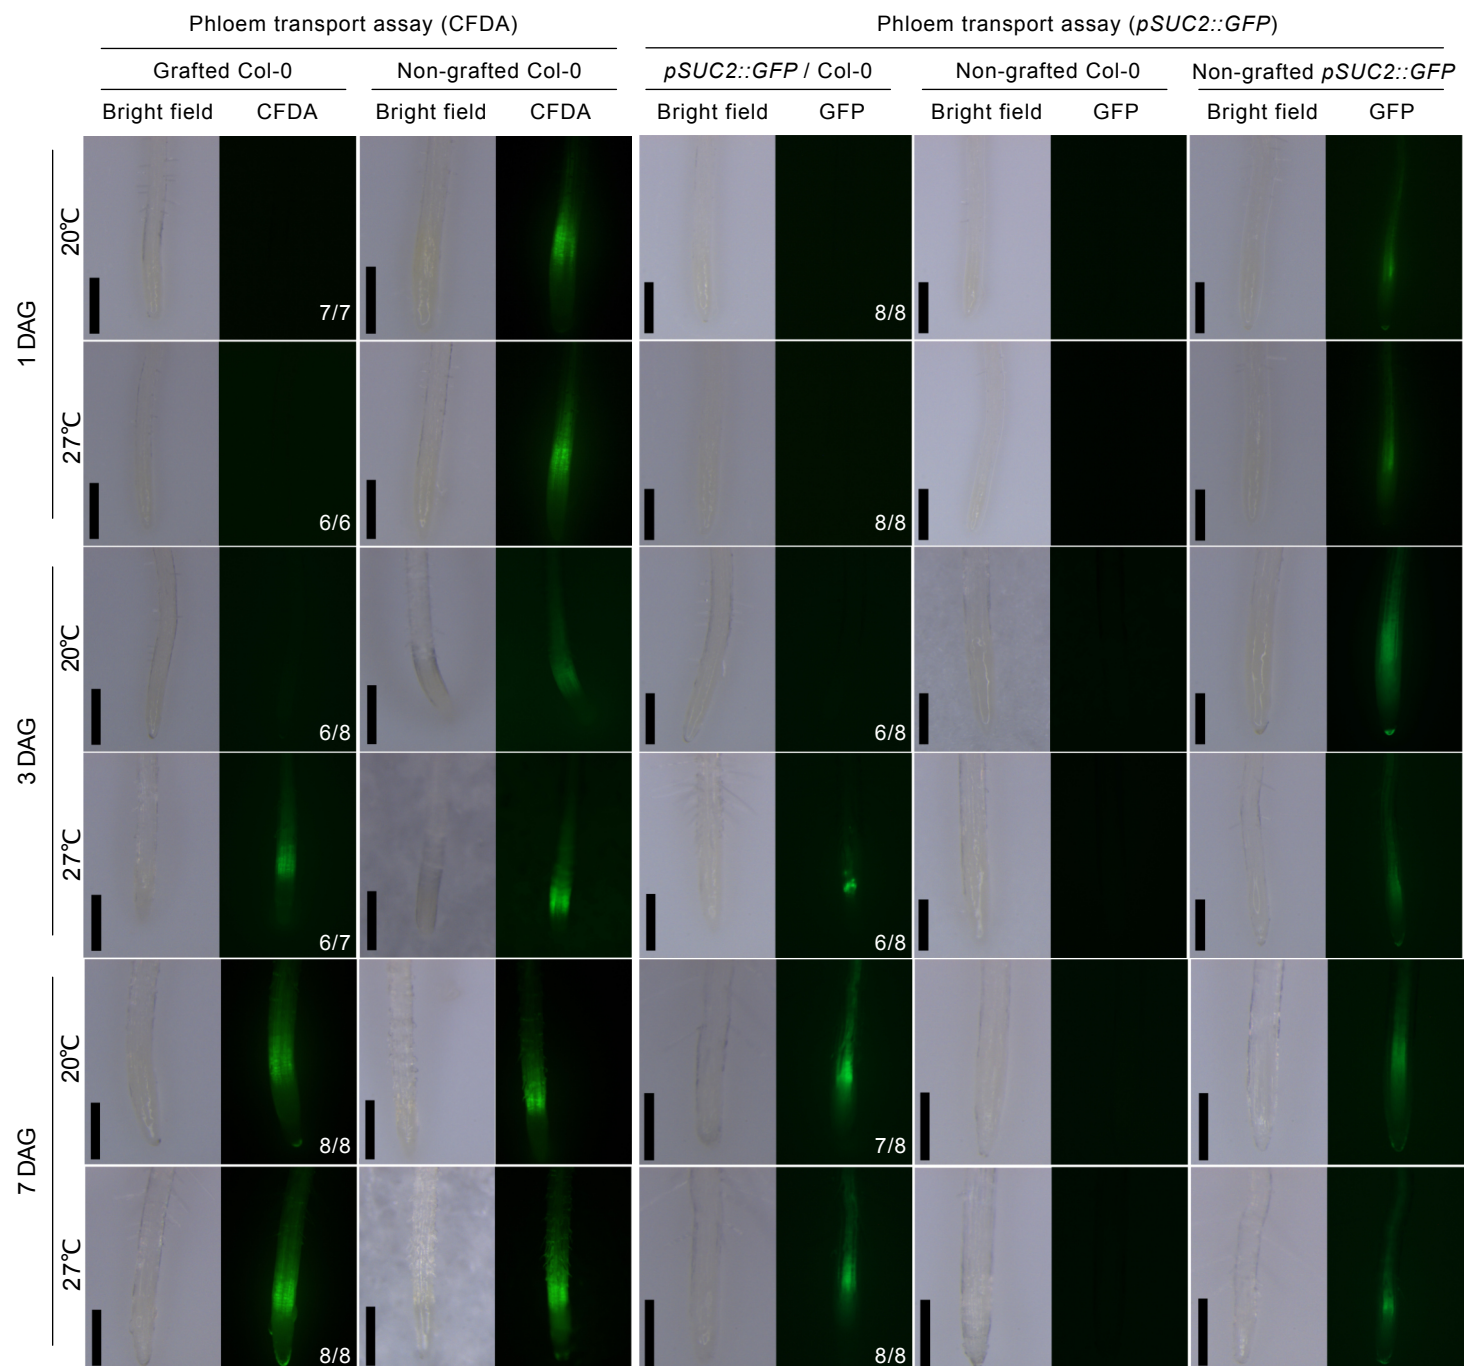

**Fig. S1. Phloem connectivity assays.** Detection of fluorescence at the root tip of plants recovered at 20°C or 27°C. The number at the bottom right represents the proportion of the shown individuals at 1, 3, and 7 DAG. Scale bars=200 µm.

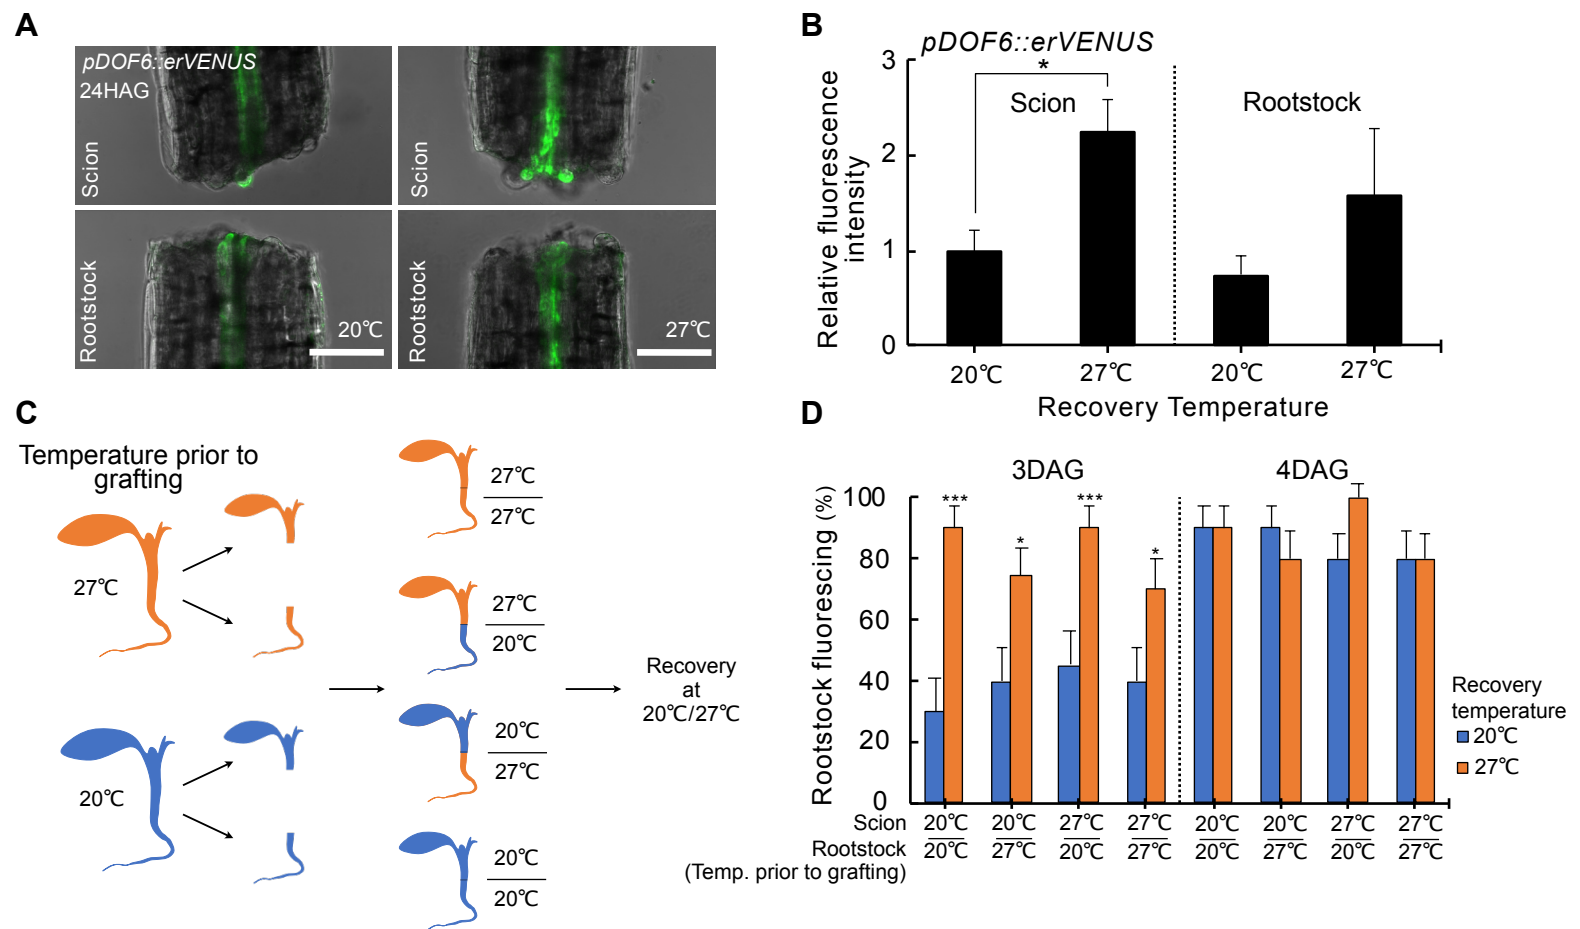

**Fig. S2. Elevated temperatures are required during graft recovery.** (A) Confocal images of *pDOF6::erVENUS* scions and rootstocks of plants recovered at 20°C or 27°C at 24 hours after grafting (HAG). Plants were grafted but not firmly attached during imaging at 24 hours so scions and rootstocks are shown separately. Scale bars=100  $\mu$ m. (B) Signal intensity of *pDOF6::erVENUS* signal at the graft junction recovered at 20°C or 27°C (mean  $\pm$ s.d. of three experiments, each  $\geq$ 15 plants per temperature treatment). \* $P$ <0.01; unpaired two-tailed Student's *t*-test. (C) Col-0 seedlings cultivated for 7 days at 20°C or 27°C were cut and grafted with various temperature combinations. The grafted plants were subsequently transferred to recover at 20°C or 27°C. (D) Proportion of grafted wild-type *Arabidopsis* that transported CFDA to the rootstock 3-4 DAG and recovered at 20°C or 27°C. The combination of temperature treatment prior to grafting is indicated ( $\pm$ s.e.p.;  $n$ =20 plants per temperature per time point). \* $P$ <0.05; \*\* $P$ <0.01; \*\*\* $P$ <0.001; Fisher's exact test.

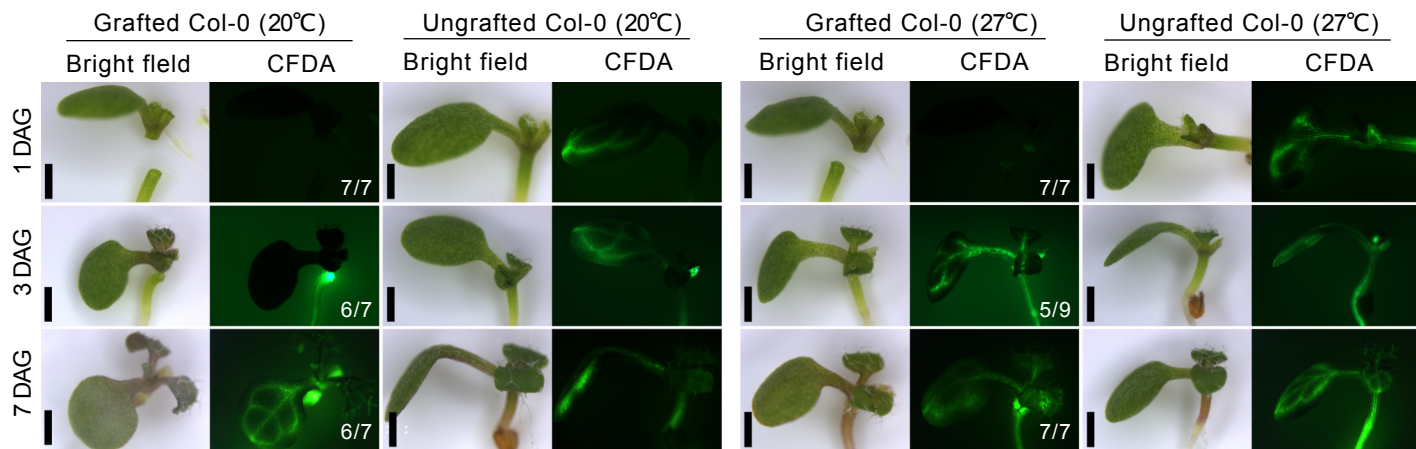

**Fig. S3. Xylem connectivity assays.** Detection of fluorescence at the shoot of plants recovered at 20°C or 27°C. The number at the bottom right represents the proportion of the shown individuals at 1, 3, and 7 DAG. Scale bars=500  $\mu$ m.

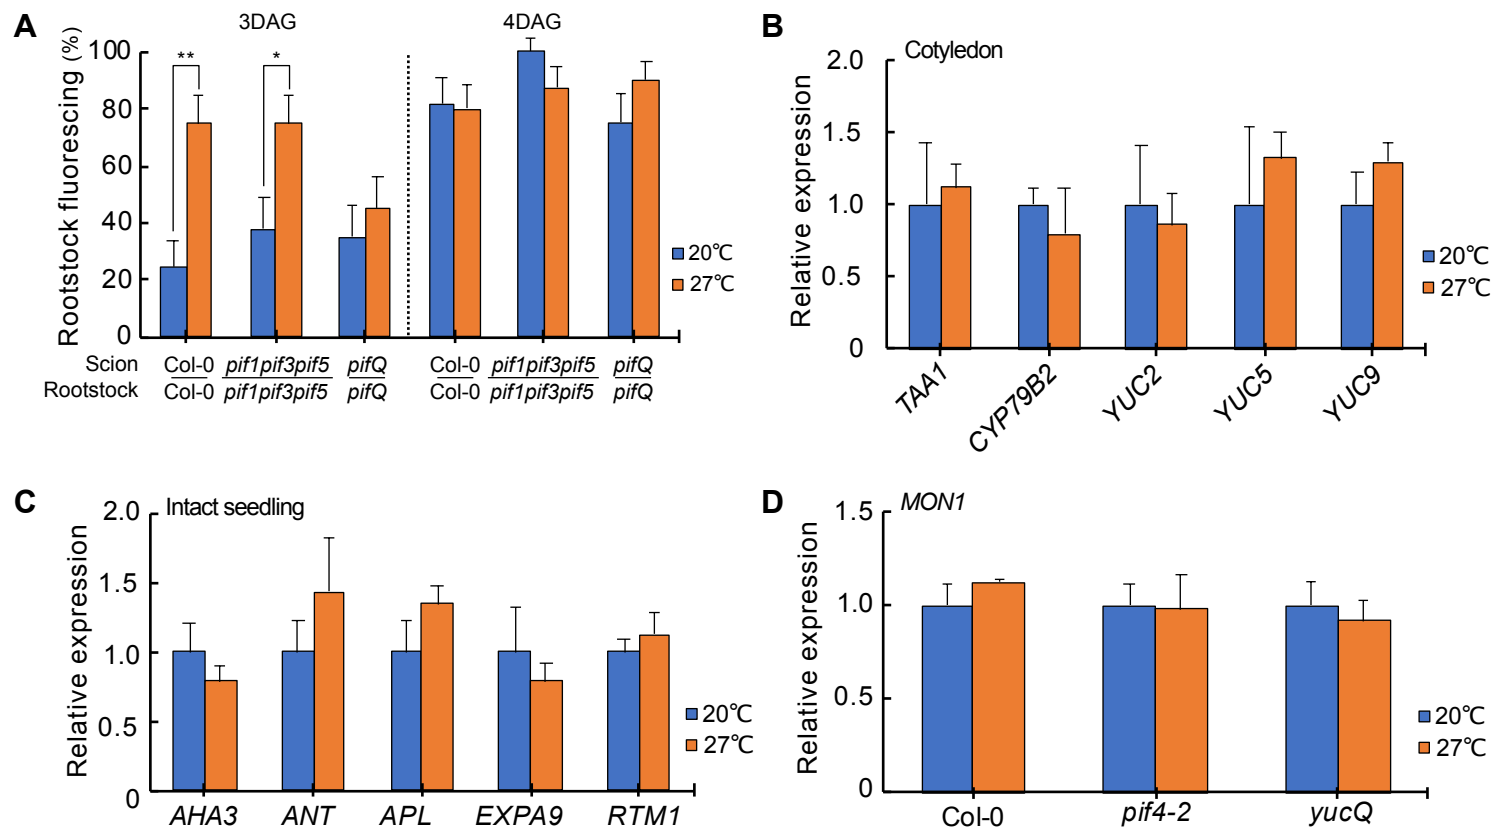

**Fig. S4. Grafting of *pif* mutants and expression analysis of selected genes.**

(A) Proportion of grafted wild-type, *pif1pif3pif5*, or *pif1pif3pif4pif5* (*pifQ*) *Arabidopsis* that transported CFDA to the rootstock 3-4 DAG and recovered at 20°C or 27°C ( $\pm$ s.e.p.; n=20 plants per temperature per time point). \* $P < 0.05$ ; \*\* $P < 0.01$ ; \*\*\* $P < 0.001$ ; Fisher's exact test. (B) Relative expression levels of selected auxin biosynthesis genes in the cotyledons of 7 day-old Col-0 incubated at 20°C and 27°C for 48 hours. (C) Relative expression levels of selected vascular genes in 7 day-old Col-0 seedlings incubated at 20°C and 27°C for 48 hours. (D) Relative expression levels of temperature-stable housekeeping gene *MON1* in 7 day-old seedlings incubated at 20°C and 27°C for 48 hours. (B-D) The expression levels of each gene is normalized to expression at 20°C (mean $\pm$ s.d. of three biological replicates). Unpaired two-tailed Student's *t*-test was performed, and the data show no significant difference compared to 20°C ( $P < 0.01$ ).



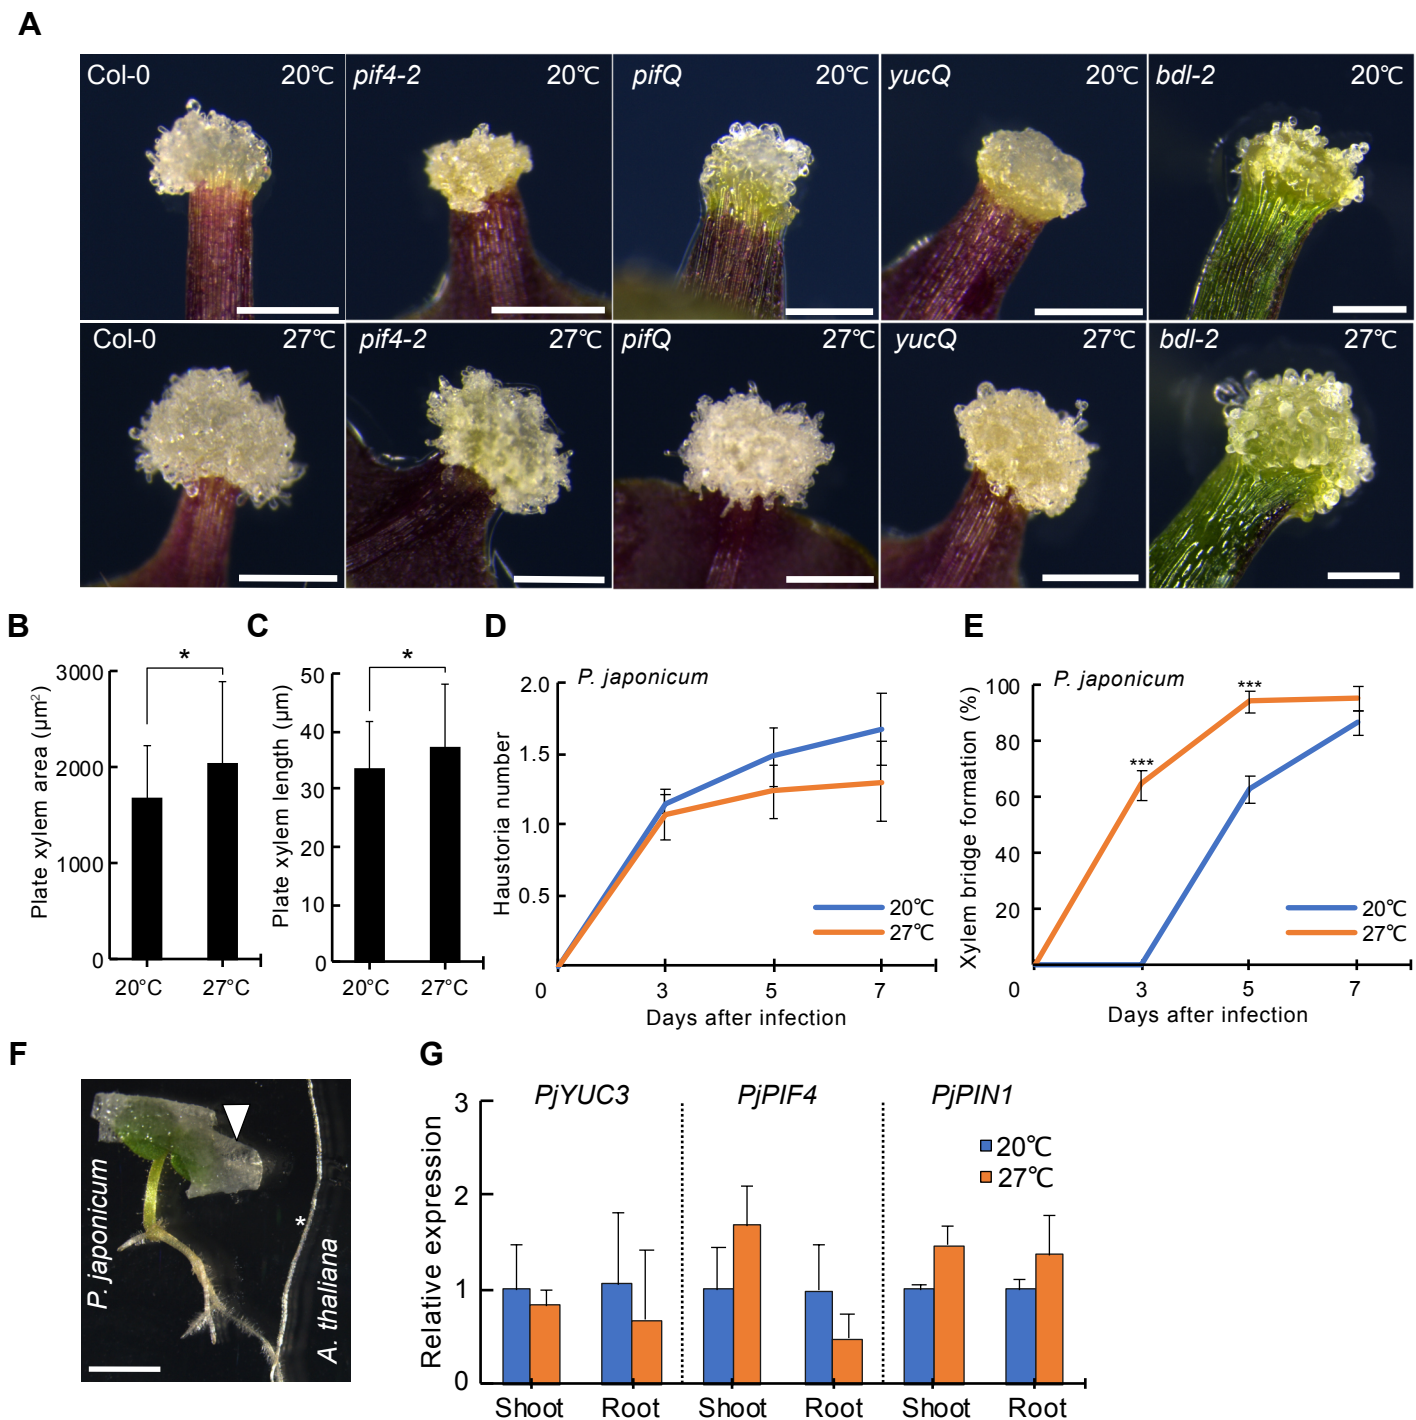

**Fig. S5. Elevated temperatures promote several aspects of tissue regeneration.** (A) Callus formation from cut petioles at 20°C or 27°C. Scale bars=500  $\mu\text{m}$ . The images are representative of the average of 60 leaves from each genotype and temperature treatment. Col-0 taken from Fig.4B. (B-C) Measurement of plate xylem area (B) and length (C) in the haustoria of the parasitic plant *P. japonicum* infecting the host plant *Arabidopsis* at 7 DPI at 20°C or 27°C. The value indicates the mean ( $\pm$ s.d.) of 74 haustoria per temperature treatment. \* $P < 0.01$ ; unpaired two-tailed Student's *t*-test. (D) Haustoria number of *P. japonicum* infecting *Arabidopsis* at 20°C and 27°C (mean $\pm$ s.d. from four experiments,  $n = 20$  infections per treatment). (E) Proportion of *P. japonicum* xylem bridge formation at 20°C or 27°C ( $\pm$ s.e.p.;  $n = 40$  infections per treatment). (F) Representative images of cotyledon NPA application on *P. japonicum*. The white arrow head indicates the site of the NPA plaster. The asterisk indicates the root of the *Arabidopsis* host. (G) Relative expression levels of auxin-related genes in the parasitic plants at 7 DPI in the shoots and roots at 20°C or 27°C (mean $\pm$ s.d. from three experiments). Unpaired two-tailed Student's *t*-test was performed, and the data show no significant difference compared to 20°C ( $P < 0.01$ ).

**Table S1.** Genotypes tested for phloem connection. 7-day-old seedlings were self-grafted (unless indicated) and recovered at 20°C or 27°C. Phloem reconnection measurement was done by CFDA assay at 3 and 4 DAG. The value indicates percentage of rootstocks fluorescing of at least 20 plants. Asterisks indicate the heterograft with Col-0 rootstocks.

| Genotype                                  | Background | Rootstock fluorescing (%) |      |      |      | Genotype reference                                              |
|-------------------------------------------|------------|---------------------------|------|------|------|-----------------------------------------------------------------|
|                                           |            | 3DAG                      |      | 4DAG |      |                                                                 |
|                                           |            | 20°C                      | 27°C | 20°C | 27°C |                                                                 |
| Col-0                                     |            | 30                        | 80   | 80   | 90   |                                                                 |
| Ler                                       |            | 10                        | 30   | 55   | 65   |                                                                 |
| <i>alf4-2/Col-0*</i>                      | Col-0      | 20                        | 60   | 80   | 90   | Bagchi et al. 2018. The EMBO journal. 37(2), 255–268.           |
| <i>arf6-2</i>                             | Col-0      | 50                        | 70   | 60   | 85   | Nagpal et al. 2005. Development. 132, 4107–4118.                |
| <i>arf7-1 arf19-1</i>                     | Col-0      | 30                        | 90   | 85   | 95   | Okushima et al. (2005). Plant Cell. 17, 444–463.                |
| <i>arf8-3</i>                             | Col-0      | 30                        | 75   | 70   | 75   | Nagpal et al. 2005. Development. 132, 4107–4118.                |
| <i>arp6-1</i>                             | Col-0      | 30                        | 80   | 65   | 90   | Deal et al. 2005. Plant cell. 17(10), 2633–2646                 |
| <i>axr1-12/Col-0*</i>                     | Col-0      | 10                        | 80   | 40   | 80   | Lincoln et al. 1990. Plant Cell. 2, 1071–1080.                  |
| <i>axr4-2</i>                             | Col-0      | 20                        | 90   | 80   | 90   | Hobbie et al. 1995. The Plant Journal. 7, 211–220.              |
| <i>hy5-51</i>                             | Col-0      | 12                        | 54   | 50   | 80   | Ruckle et al. 2007. Plant Cell. 19(12), 3944–3960.              |
| <i>iaa3 (shy2-2)</i>                      | Ler        | 30                        | 40   | 65   | 70   | Reed et al. 1998. Genetics. 148, 1295–1310.                     |
| <i>iaa7 (axr2-1)</i>                      | Col-0      | 0                         | 70   | 50   | 90   | Wilson et al. 1990. Molecular & General Genetics. 222, 377–383. |
| <i>iaa12 (bd1-2)</i>                      | Col-0      | 35                        | 45   | 75   | 90   | Hayward et al. 2009. Plant Physiology. 151, 400–412.            |
| <i>iaa14 (slr1)</i>                       | Col-0      | 0                         | 90   | 60   | 80   | Fukaki et al. 2002. The Plant Journal. 29, 153–168.             |
| <i>iaa19 (msg2-1)</i>                     | Col-0      | 30                        | 70   | 70   | 80   | Tatematsu et al. 2004. Plant Cell. 16, 379–393.                 |
| <i>pif4-2</i>                             | Col-0      | 30                        | 35   | 98   | 90   | Leivar et al. 2008. Plant Cell. 20(2), 337–52.                  |
| <i>pif1-1 pif3-7 pif5-3</i>               | Col-0      | 37                        | 75   | 95   | 90   | Leivar et al. 2008. Current Biology. 18(23), 1815–1823.         |
| <i>pifQ (pif1-1 pif3-7 pif4-2 pif5-3)</i> | Col-0      | 35                        | 45   | 75   | 90   | Leivar et al. 2008. Current Biology. 18(23), 1815–1823.         |
| <i>35S::PIF4-HA</i>                       | Col-0      | 0                         | 0    | 0    | 0    | Lorrain et al. 2008. Plant Journal. 53(2), 312–323.             |
| <i>tir1-1afb2-3</i>                       | Col-0      | 0                         | 25   | 30   | 75   | Parry et al. 2009. PNAS. 106, 22540–22545.                      |
| <i>wei8 tar1-1</i>                        | Col-0      | 5                         | 50   | 30   | 75   | Stepanova et al. 2008. Cell. 133(1):177–191.                    |
| <i>wei8-4</i>                             | Col-0      | 0                         | 50   | 45   | 90   | Stepanova et al. 2008. Cell. 133(1):177–191.                    |
| <i>yucQ (yuc2 yuc5 yuc8 yuc9)</i>         | Col-0      | 30                        | 20   | 70   | 88   | Müller-Moulé et al. 2016. PeerJ. 4, e2574.                      |
| <i>yuc1D</i>                              | Col-0      | 0                         | 20   | 15   | 60   | Zhao et al. 2001. Science. 291:306–9.                           |
| <i>yuc1D/Col-0*</i>                       | Col-0      | 20                        | 20   | 30   | 30   | Zhao et al. 2001. Science. 291:306–9.                           |
| <i>35S::AtPHYB</i>                        | Col-0      | 0                         | 0    | 5    | 15   | Su and Lagarias. 2007. Plant Cell. 19(7):2124–39.               |
| <i>phyB-9</i>                             | Col-0      | 15                        | 25   | 55   | 90   | Reed et al. 1993. Plant Cell. 5(2), 147–157                     |
| <i>pgp1 pgp19</i>                         | Col-0      | 5                         | 20   | 25   | 40   | Geisler et al. 2003. Molecular Biology Cell. 14:4238–4249.      |
| <i>pgp4-1</i>                             | Col-0      | 5                         | 35   | 15   | 65   | Terasaka et al. 2005. Plant Cell. 17(11), 2922–2939.            |
| <i>pin1-1</i>                             | Col-0      | 5                         | 35   | 50   | 70   | Okada et al 1991. Plant Cell. 3:677.                            |
| <i>pin3-3 pin4-3 pin7-1</i>               | Col-0      | 0                         | 15   | 0    | 15   | Bennett et al. 2016. PLoS Biology. 14, e1002446.                |
| <i>aux1 lax1 lax2 lax3</i>                | Col-0      | 0                         | 5    | 5    | 25   | Bainbridge et al. 2008. Genes Development. 22(6), 810–823.      |
| <i>35S::bZR1-1D</i>                       | Col-0      | 40                        | 85   | 95   | 95   | Oh et al 2014. Nature Communication. 5:4140.                    |
| <i>bes1D</i>                              | Col-0      | 0                         | 5    | 20   | 0    | Yin et al. 2002. Cell. 109(2):181–191.                          |

**Table S2.** Primer sequences used for qPCR.

| Gene    | Direction | Sequence (5'-3')          | Gene ID       | GenBank accession |
|---------|-----------|---------------------------|---------------|-------------------|
| AHA3    | Forward   | GCTGGTATGGATGTTCTGTGC     | AT5G57350     |                   |
| AHA3    | Reverse   | GGTTCGCTTATCAACTGGATT     | AT5G57350     |                   |
| ANT     | Forward   | GATGTAGCAGCAATTAAGTTCCG   | AT4G37750     |                   |
| ANT     | Reverse   | GAGCGGTTTGGTCTTCAGTATT    | AT4G37750     |                   |
| APL     | Forward   | ACCAAGTCCTCGACCATCACA     | AT1G79430     |                   |
| APL     | Reverse   | CTCCGACAAAGAATCCAAATCC    | AT1G79430     |                   |
| TAA1    | Forward   | ACGCAAACGCAGGGTAAGA       | AT1G70560     |                   |
| TAA1    | Reverse   | AGATGATGAAGAATCGGTGGG     | AT1G70560     |                   |
| CYP79B2 | Forward   | CATCGACGAGAGGATCAAGATGTGG | AT4G39950     |                   |
| CYP79B2 | Reverse   | TTGGGATGTCGGATTCTTGAACGAG | AT4G39950     |                   |
| EXPA9   | Forward   | TGATCTCGCTATGCCTATGTTT    | AT5G02260     |                   |
| EXPA9   | Reverse   | TGACCAGCACCAAGTTGAAGTA    | AT5G02260     |                   |
| PIF4    | Forward   | GCCAAAACCCGGTACAAAACCA    | AT2G43010     |                   |
| PIF4    | Reverse   | CGCCGGTCAACTAAATCTCAACATC | AT2G43010     |                   |
| RTM1    | Forward   | ATTGTAAGTGGACGAAGGAT      | AT1G05760     |                   |
| RTM1    | Reverse   | CGTACTCGCTAGTGTGGTATTG    | AT1G05760     |                   |
| YUC2    | Forward   | ATTGTCATCCTTCTCCCTC       | AT4G13260     |                   |
| YUC2    | Reverse   | TTCGTCCAATACCTTGAGTCTTAC  | AT4G13260     |                   |
| YUC5    | Forward   | CATTAGCATTGTGATTTGCCGAGAT | AT5G43890     |                   |
| YUC5    | Reverse   | GGAGTTTGAAGGCGAGGTGA      | AT5G43890     |                   |
| YUC8    | Forward   | AAACGCTCAAGGGTCTCTTTCG    | AT4G28720     |                   |
| YUC8    | Reverse   | CACGCACAACACCCCTTGGATTCG  | AT4G28720     |                   |
| YUC9    | Forward   | AAGGAGTCCCATTCGTTGTG      | AT1G04180     |                   |
| YUC9    | Reverse   | CGTTGGGTATTCAGGGTAGTG     | AT1G04180     |                   |
| MON1    | Forward   | CAGACAAGGCGATGGCGATA      | AT2G28390     |                   |
| MON1    | Reverse   | GCTTTCTCTCAAGGGTTCTGGGT   | AT2G28390     |                   |
| PjPIF4  | Forward   | GCGTCGTAACCCGACAAC        | Pjv1_00017700 | BMAC01000436      |
| PjPIF4  | Reverse   | CGAAGCCCAACTCTTGTTCCA     | Pjv1_00017700 | BMAC01000436      |
| PjYUC1  | Forward   | CTACGCCAGCCACTTCTCAA      | Pjv1_00018474 | BMAC01000416      |
| PjYUC1  | Reverse   | GATTTCCGGTATCACGGGCT      | Pjv1_00018474 | BMAC01000416      |
| PjYUC2  | Forward   | AAATTCGGCATGGAGGTGT       | Pjv1_00010538 | MN064668          |
| PjYUC2  | Reverse   | CACGAGCCATAGTGGTAGCC      | Pjv1_00010538 | MN064668          |
| PjYUC3  | Forward   | TTTGGGTAGTGGACCGGGTA      | Pjv1_00016159 | MN064669          |
| PjYUC3  | Reverse   | TCAGCCCATGCTCTTCTGTG      | Pjv1_00016159 | MN064669          |
| PjYUC4  | Forward   | GCCTTAAAGAGCATGGCGTC      | Pjv1_00003857 | MN064670          |
| PjYUC4  | Reverse   | ATTGCTTGGGGAGATGGAGC      | Pjv1_00003857 | MN064670          |
| PjPIN1  | Forward   | AAGTGCAAGTGCGAGCTTTG      | Pjv1_00008680 | BMAC01000122      |
| PjPIN1  | Reverse   | TTTGGGGTACAGTGGTGGTG      | Pjv1_00008680 | BMAC01000122      |
| PjPP2A  | Forward   | GGGTCTTTCACCTCACTC        | Pjv1_00012240 | BMAC01000248      |
| PjPP2A  | Reverse   | CATGCGGAACCTCCTGTGTA      | Pjv1_00012240 | BMAC01000248      |
